# Supplementary material for: New insights into the cultivability of human milk bacteria from ingestion to digestion and implications for their Immunomodulatory properties
Source: Springer Nature journal article supplement (doi:10.1038/s41598-025-95668-6), 2025-03-31
Supplement: MOESM1 [file 41598_2025_95668_MOESM1_ESM.pdf]

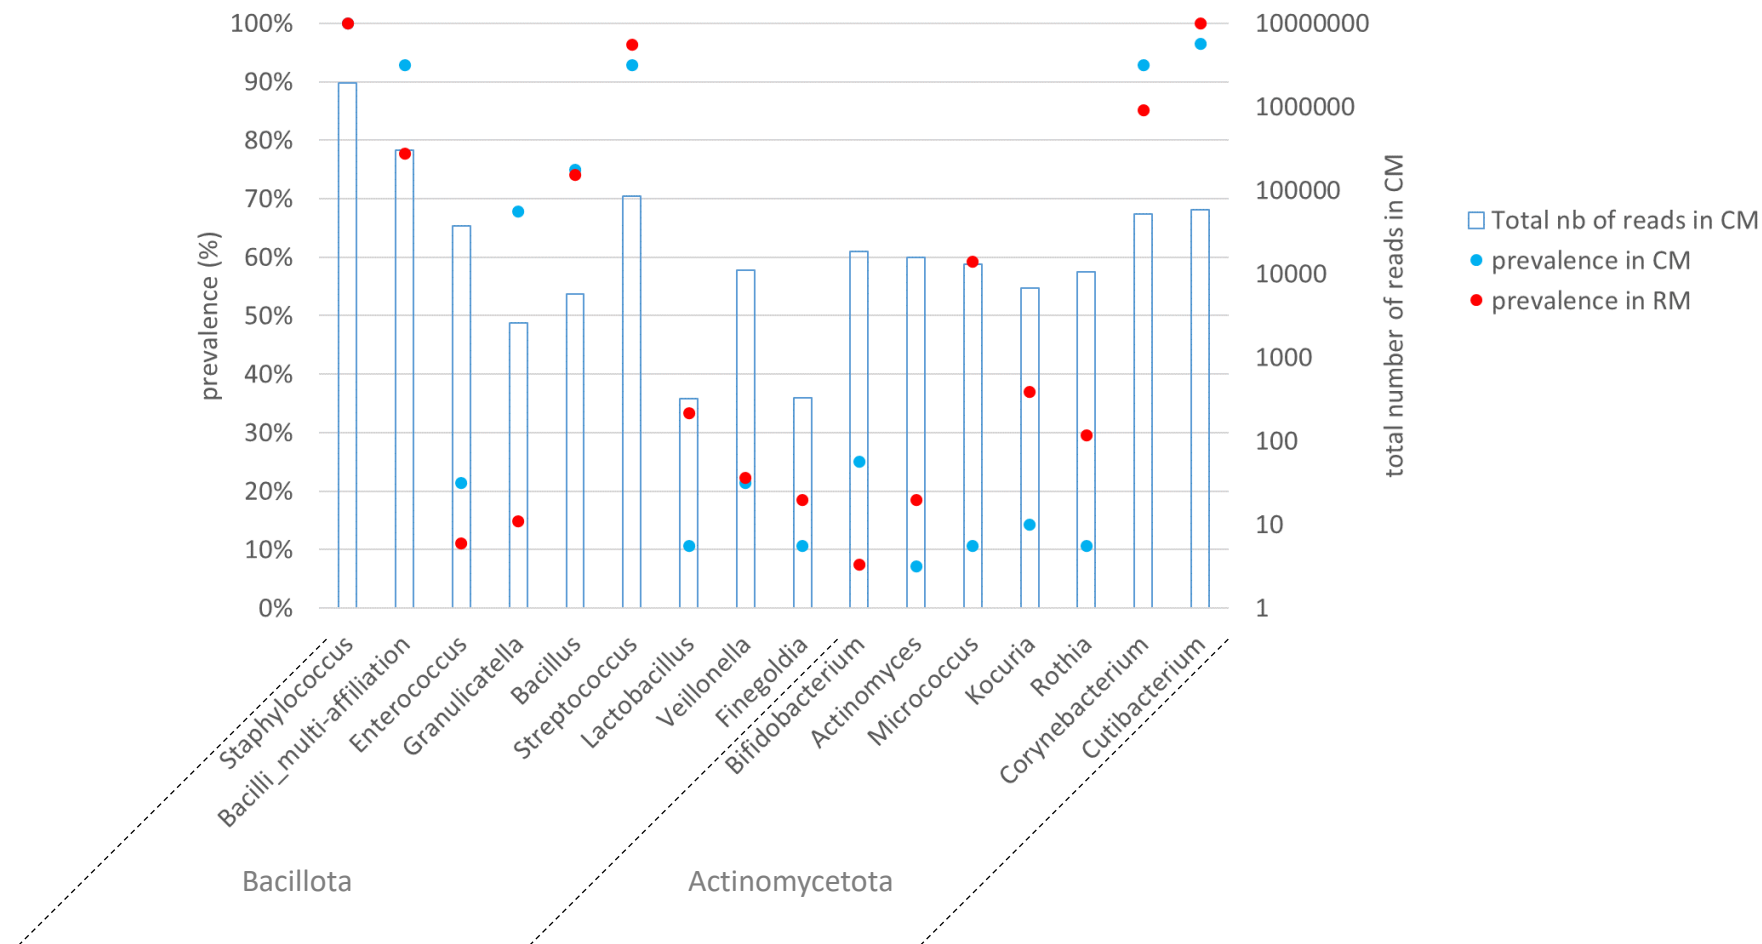

**Supplementary Figure S1.** Prevalent genera in the cultivable milk microbiota

Genera with prevalence in the cultivable milk microbiota (●) higher than 7% (corresponding to a minimum of 2 HM samples) and with a total relative abundance in CM higher than 0.00005 (bar chart) are presented, as well as the prevalence of these genera in the raw milk microbiota (RM) (●).
